# Supplementary material for: VDAC1 Knockout Affects Mitochondrial Oxygen Consumption Triggering a Rearrangement of ETC by Impacting on Complex I Activity
Source: MDPI journal article supplement (doi:10.3390/ijms24043687), 2023-02-12
Supplement: s1 [file s1]

# **VDAC1 Knockout Affects Mitochondrial Oxygen Consumption Triggering a Rearrangement of ETC by Impacting on Complex I Activity**

**Andrea Magri<sup>1,2,\*</sup>, Salvatore Antonio Maria Cubisino<sup>3†</sup>, Giuseppe Battiato<sup>3</sup>, Cristiana Lucia Rita Lipari<sup>3</sup>, Stefano Conti Nibali<sup>3</sup>, Miriam Wissam Saab<sup>4</sup>, Alessandra Pittalà<sup>4</sup>, Angela Maria Amorini<sup>4</sup>, Vito De Pinto<sup>2,3</sup>, Angela Messina<sup>1,2</sup>**

<sup>1</sup> Department of Biological, Geological and Environmental Sciences, University of Catania, Via S. Sofia 64, 95125 Catania, Italy

<sup>2</sup> we.MitoBiotech S.R.L., C.so Italia 174, 95125 Catania, Italy.

<sup>3</sup> Department of Biomedical and Biotechnological Sciences, University of Catania, Via S. Sofia 64, 95125 Catania, Italy

<sup>4</sup> Department of Biomedical and Biotechnological Sciences, Division of Medical Biochemistry, University of Catania, Via S.Sofia 97, 95123 Catania, Italy

\* Correspondence: andrea.magri@unict.it.

† These authors have equally contributed

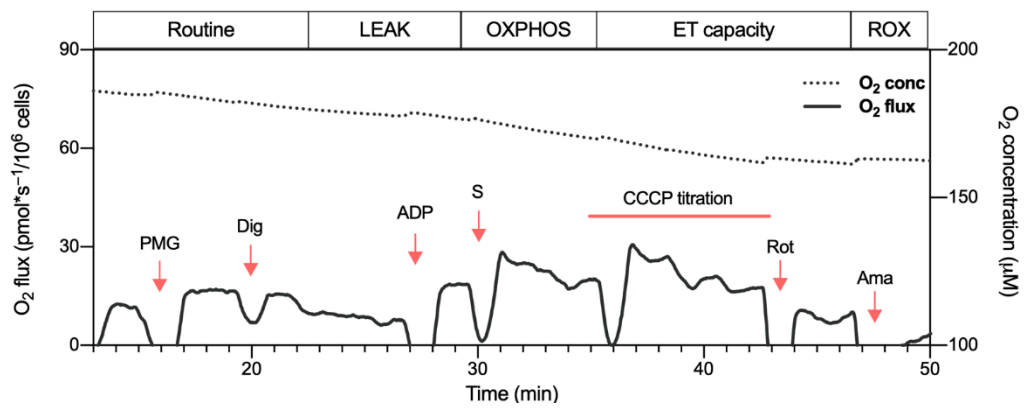

**Figure S1.** Oxygen consumption in HAP1 VDAC1 knock-out cells. A representative curve of mitochondrial respiratory profile of HAP1  $\Delta$ VDAC1 cells along with the SUIT protocol used in this work. P, pyruvate; M, malate; G, glutamate; Dig, digitonin; S, succinate; Rot, rotenone; Ama, antimycin.

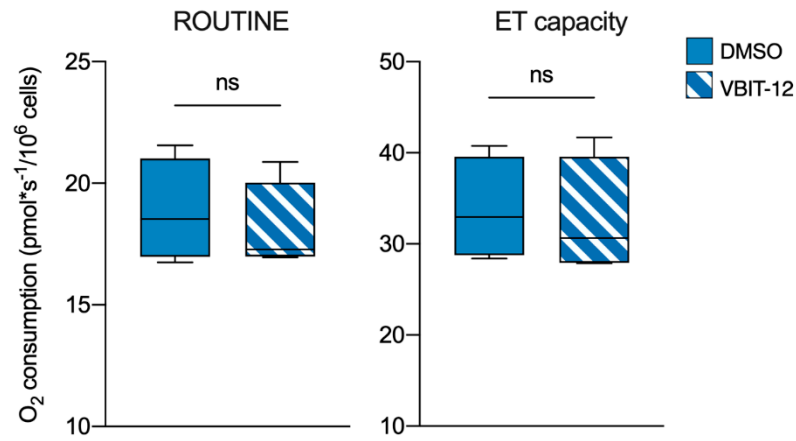

**Figure S2.** Analysis of VBIT-12 effect on respiration of  $\Delta$ VDAC1 cells. Quantitative analysis of the oxygen consumption rates of ROUTINE and maximal ET capacity in HAP1  $\Delta$ VDAC1 cells previously treated with VBIT-12 or DMSO (control). No significant variation has been observed for both ROUTINE or ET capacity. Data are expressed as pmol/second per million cells and shown as median  $\pm$  SEM of n=6 independent experiments.

**Table S1.** Raw data of the nicotinamide dinucleotides expressed as nmol/million cells. Data are relative to the quantification of each nicotinamide dinucleotide in HAP1 parental and VDAC1 knockout cells. Data are expressed as means  $\pm$  SD of n=4 independent measurements.

|                | NAD <sup>+</sup> | NADH            | NADP <sup>+</sup> | NADPH           |
|----------------|------------------|-----------------|-------------------|-----------------|
| Parental       | 1.48 $\pm$ 0.64  | 0.18 $\pm$ 0.04 | 0.42 $\pm$ 0.19   | 0.11 $\pm$ 0.04 |
| $\Delta$ VDAC1 | 0.87 $\pm$ 0.44  | 0.09 $\pm$ 0.41 | 0.22 $\pm$ 0.06   | 0.14 $\pm$ 0.04 |
